# Supplementary material for: A Co–N4 moiety embedded into graphene as an efficient single-atom-catalyst for NO electrochemical reduction: a computational study
Source: Royal Society of Chemistry journal article supplement (doi:10.1039/c8ta00875b), 2018-01-01
Supplement: c8ta00875b2.pdf [file c8ta00875b2.pdf]

## Supporting Information

### **Co-N<sub>4</sub> Moiety Embedded into Graphene as an Efficient Single-Atom-Catalyst for NO Electrochemical Reduction: a Computational Study**

Zhongxu Wang,<sup>†</sup> Jingxiang Zhao,<sup>\*,†</sup> Jingyang Wang,<sup>‡</sup>

Carlos R. Cabrera,<sup>#</sup> Zhongfang Chen<sup>\*,#</sup>

<sup>†</sup> College of Chemistry and Chemical Engineering, and Key Laboratory of Photonic and Electronic Bandgap Materials, Ministry of Education, Harbin Normal University, Harbin, 150025, China

<sup>‡</sup> Shenyang National Laboratory for Materials Science, Institute of Metal Research, Chinese Academy of Sciences, Shenyang 110016, China

<sup>#</sup> Department of Chemistry, University of Puerto Rico, Rio Piedras Campus, San Juan, PR 00931, USA

\* To whom correspondence should be addressed. Email: xjz\_hmily@163.com (JZ);  
zhongfangchen@gmail.com (ZC)

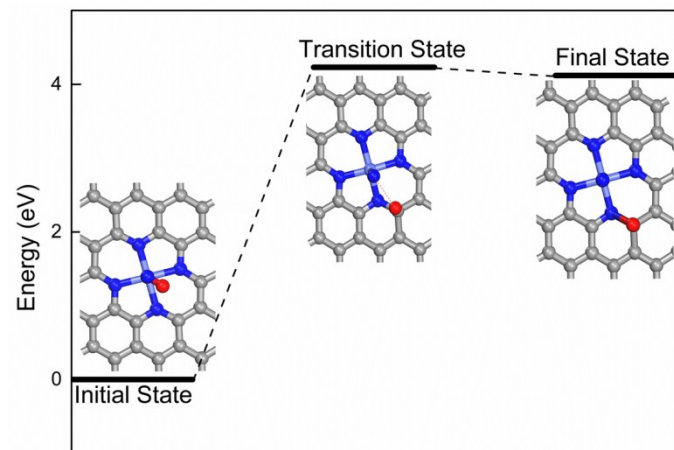

**Figure S1.** The minimum energy path (MEP) of NO dissociation on the Co-N<sub>4</sub> moiety embedded into graphene.

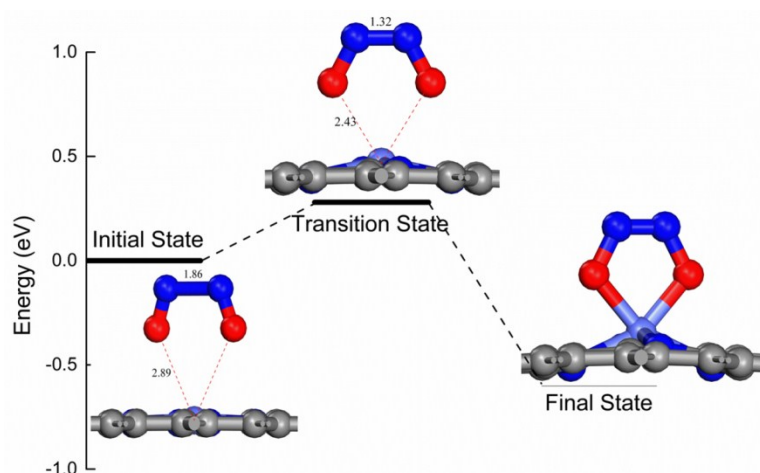

**Figure S2.** The minimum energy path (MEP) to form the energetically most favorable  $(\text{NO})_2$  dimer on the  $\text{Co-N}_4$  moiety embedded into graphene.

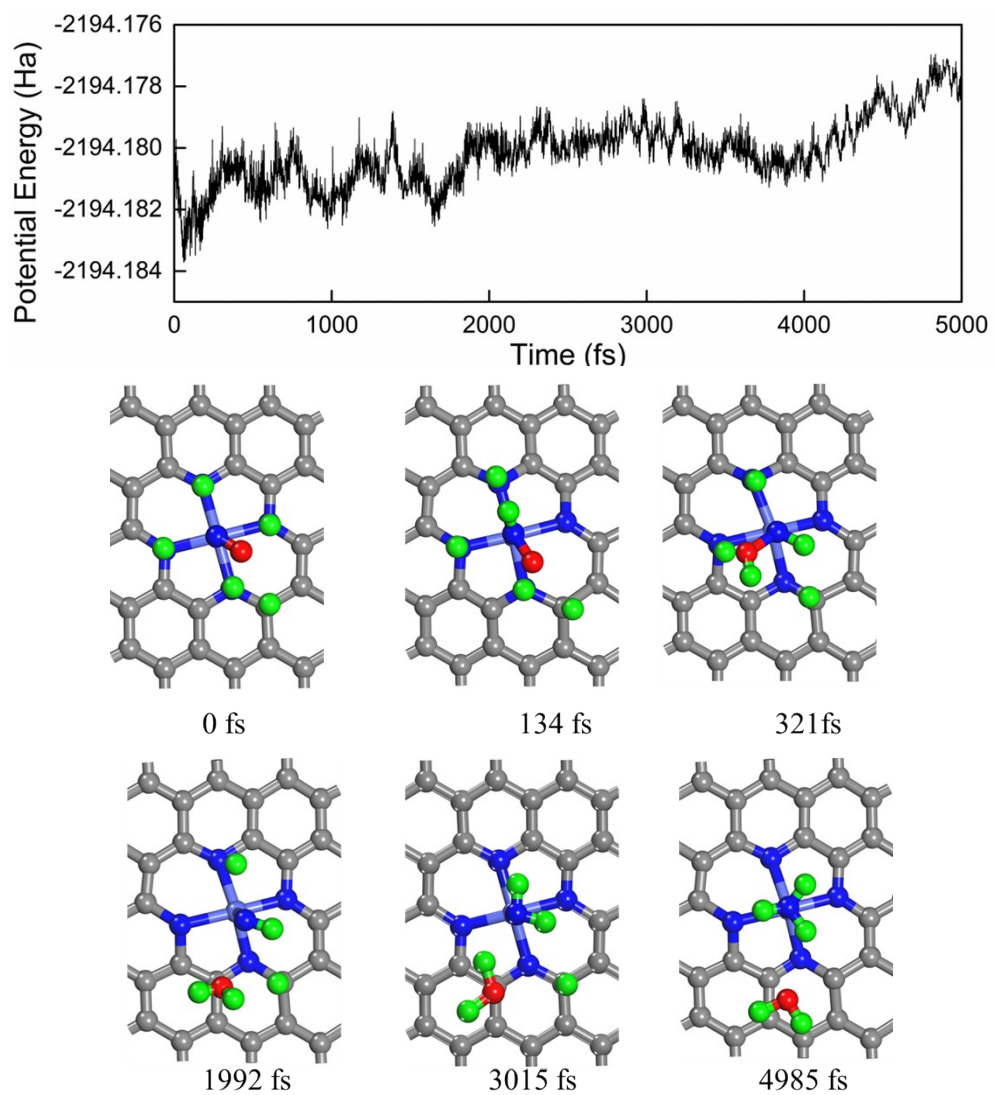

**Figure S3.** Some key snapshots during the trajectories of the first principles MD simulations of NO reduction on Co-N<sub>4</sub>/graphene at 300 K.
